# Supplementary material for: Real-time monitoring of the hydrolysis of vegetable oils loaded in silica colloidal crystal films with lipase by optical interferometry
Source: Royal Society of Chemistry journal article supplement (doi:10.1039/d2ay00811d), 2022-01-01
Supplement: d2ay00811d1.pdf [file d2ay00811d1.pdf]

**Supporting Information for**  
**Real-time monitoring of hydrolysis of vegetable oil loaded in silica**  
**colloidal crystal films with lipase by optical interferometry**

Hao Liu, Lele Zhou, Yifan Zhang, and Weiping Qian\*

*State Key Laboratory of Bioelectronics, School of Biological Science and Medical  
Engineering, Southeast University, Nanjing 210096, China*

---

\* Corresponding author.

Tel. (+8625) 83795719

*E-mail address:* [wqian@seu.edu.cn](mailto:wqian@seu.edu.cn)

**Table S1 Viscosity of four kinds of vegetable oil at 25 °C.**

| Vegetable oil | Viscosity (mPa·s)   |
|---------------|---------------------|
| Corn oil      | 54.4 <sup>[1]</sup> |
| Sesame oil    | 63.4 <sup>[2]</sup> |
| Rapeseed oil  | 60.1 <sup>[1]</sup> |
| Sunflower oil | 52.0 <sup>[1]</sup> |

**References:**

- [1] J.C.O. Santos, I.M.G. Santos, A.G. Souza, Effect of heating and cooling on rheological parameters of edible vegetable oils, *J Food Eng*, 2005, **67**, 401-405.
- [2] S.R. Valantina, V.M. Kumar, T. Devasena, Selected Rheological Characteristics and Physicochemical Properties of Vegetable Oil Affected by Heating, *Int J Food Prop*, 2016, **19**, 1852-1862.
